# Supplementary material for: Rapid preparation of binary mixtures of sodium carboxylates as anodes in sodium-ion batteries
Source: Royal Society of Chemistry journal article supplement (doi:10.1039/d3ta06928a), 2024-01-01
Supplement: d3ta06928a1.pdf [file d3ta06928a1.pdf]

## Supporting Information

---

### **Rapid Preparation of Binary Mixtures of Sodium Carboxylates as Anodes in Sodium-Ion Batteries**

*Aamod V. Desai,<sup>a,b</sup> Romy Ettliger,<sup>a</sup> Heitor S. Seleghini,<sup>a</sup> Maximillian G. Stanzione,<sup>a</sup> Joel M. Cabañero Jr.,<sup>a,b</sup> Sharon E. Ashbrook,<sup>a</sup> Russell E. Morris<sup>\*a,b</sup> and A. Robert Armstrong<sup>\*a,b</sup>*

a - EaStCHEM School of Chemistry, University of St Andrews, North Haugh, St Andrews KY16 9ST, United Kingdom.

b - The Faraday Institution, Quad One, Harwell Science and Innovation Campus, Didcot, OX11 0RA, United Kingdom.

Email: [rem1@st-andrews.ac.uk](mailto:rem1@st-andrews.ac.uk) ; [ara@st-andrews.ac.uk](mailto:ara@st-andrews.ac.uk)

---

## Figures

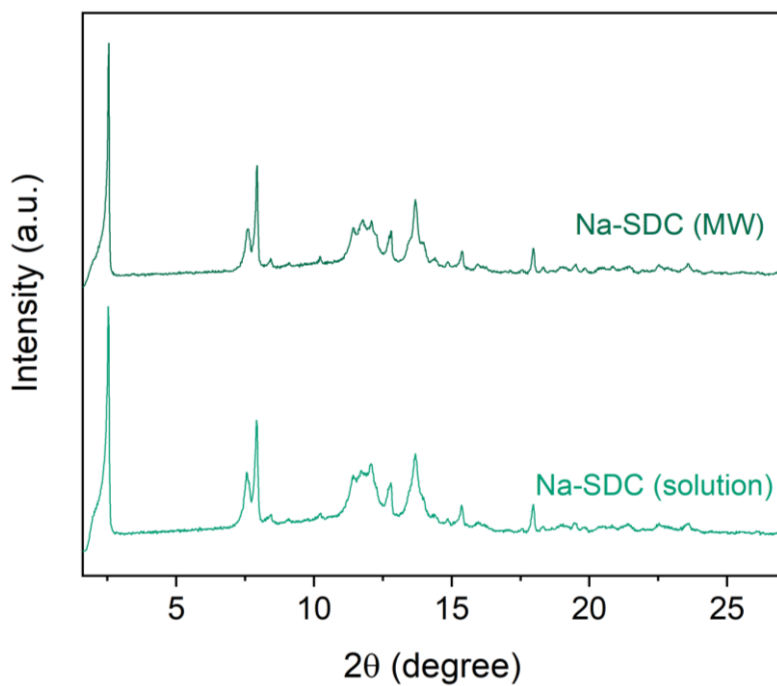

**Figure S1.** PXR D pattern for Na-(SDC)(MW), compared to the material prepared using a solution-based reaction.

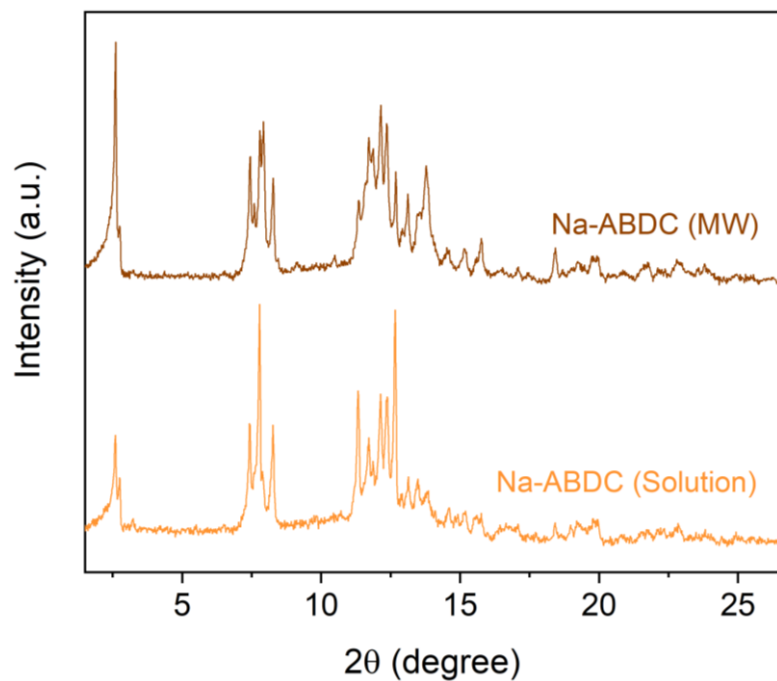

**Figure S2.** PXR D pattern for Na-(ABDC)(MW), compared to the material prepared using a solution-based reaction.

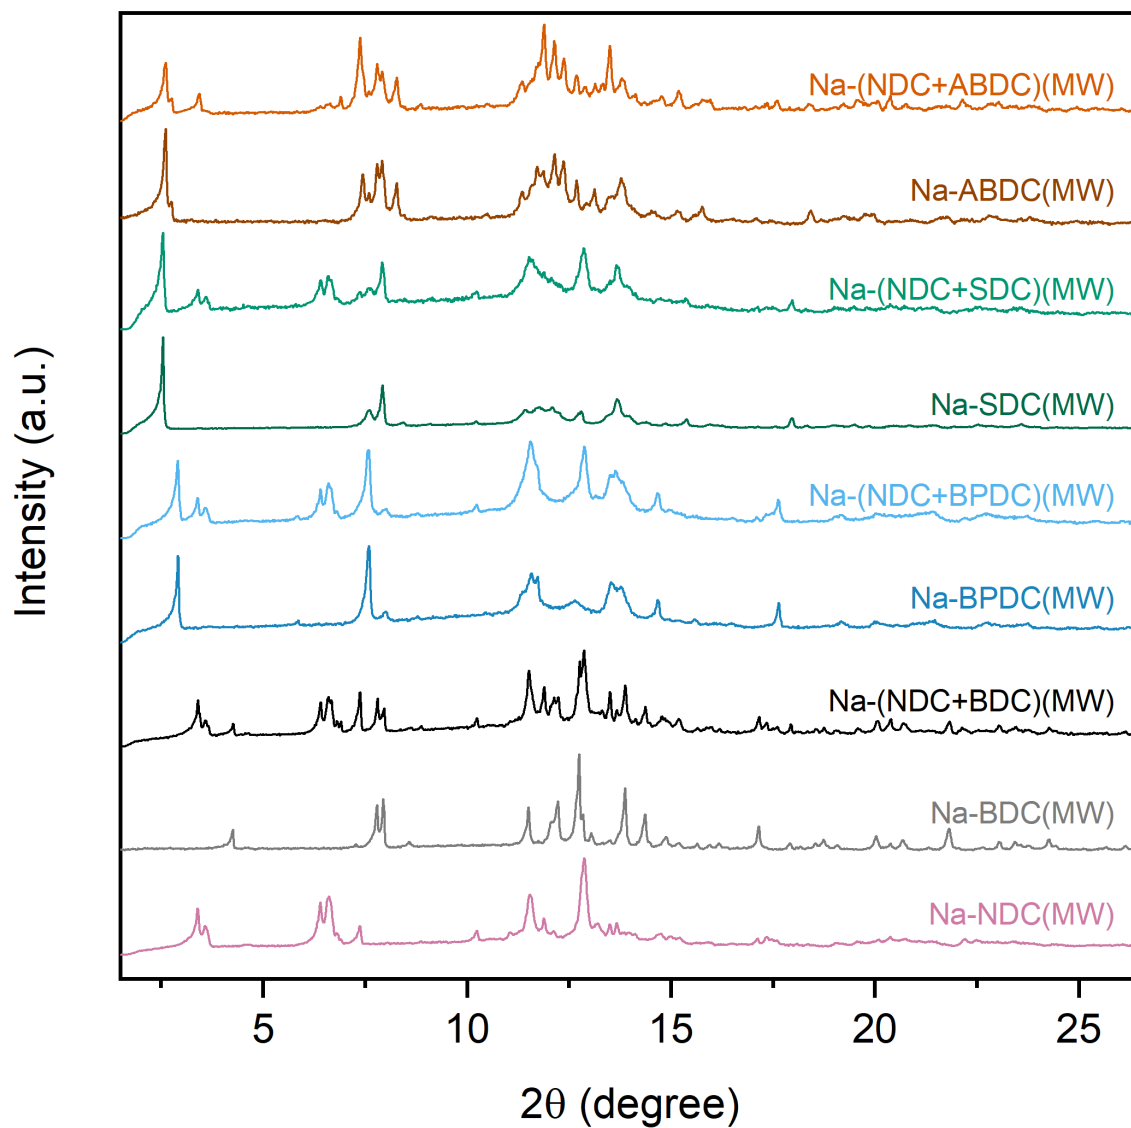

**Figure S3.** PXRD patterns for all the mixtures and single component sodium carboxylates.

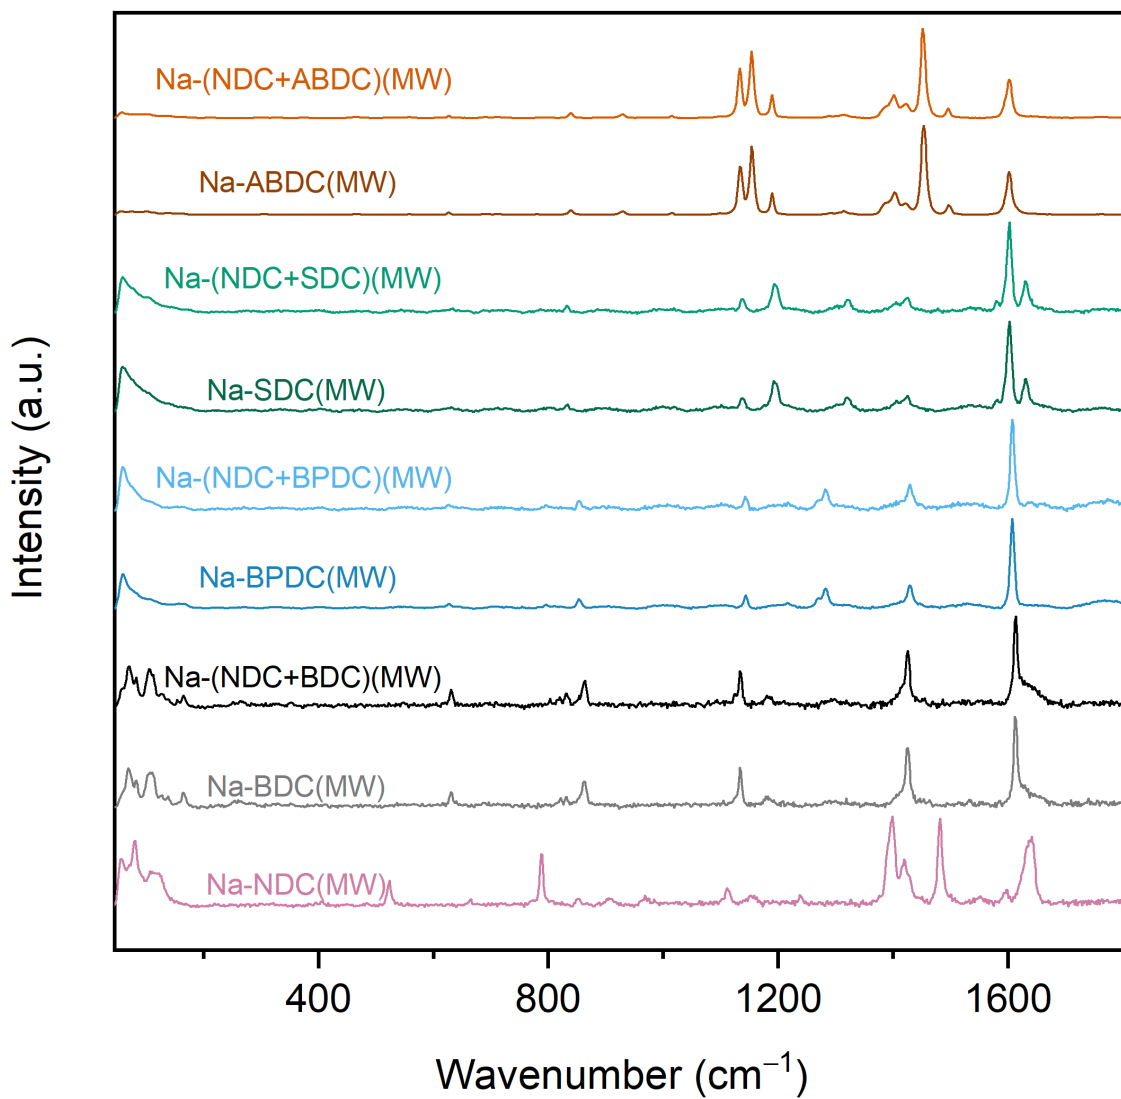

**Figure S4.** Raman spectra for all the single component sodium carboxylates and binary mixtures.

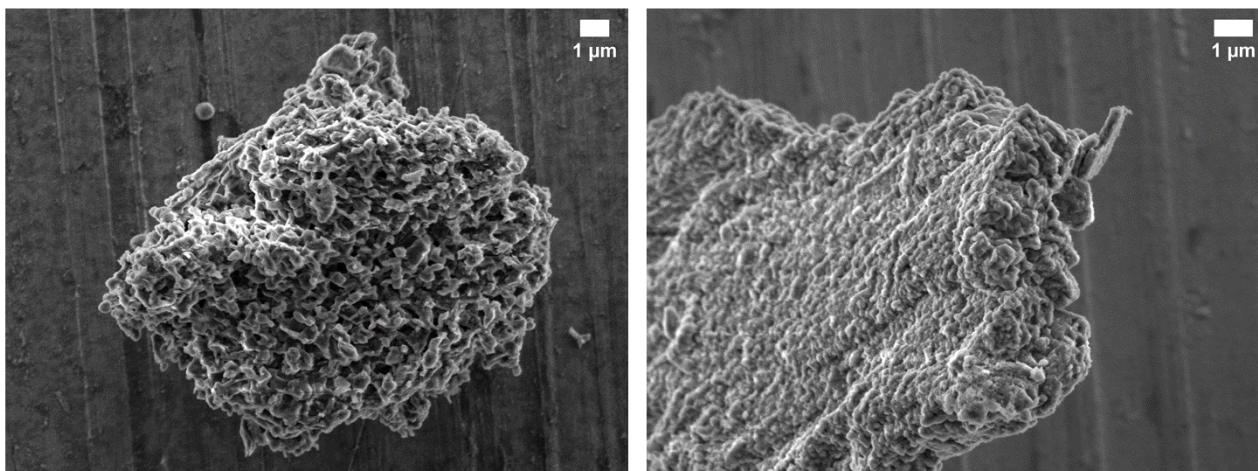

**Figure S5.** SEM images for as-synthesised powder of Na-(NDC+BDC)(MW).

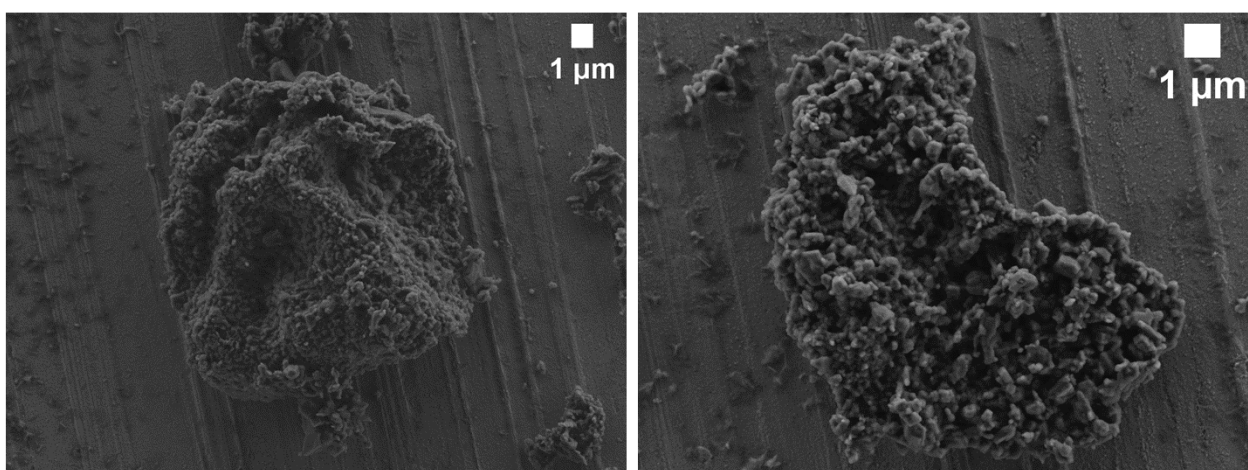

**Figure S6.** SEM images for as-synthesised powder of Na-BDC(MW).

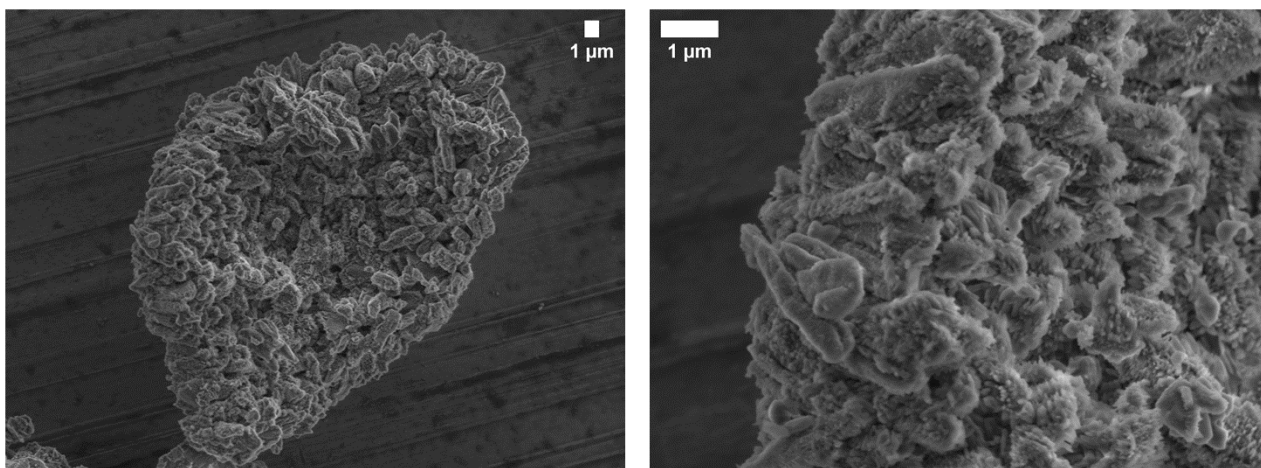

**Figure S7.** SEM images for as-synthesised powder of Na-(NDC+BPDC)(MW).

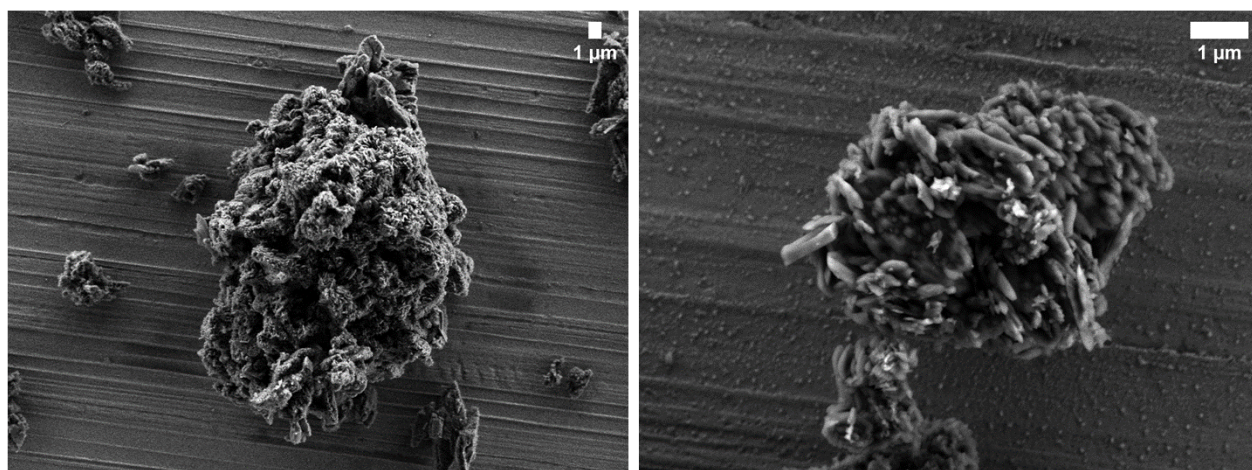

**Figure S8.** SEM images for as-synthesised powder of Na-BPDC(MW).

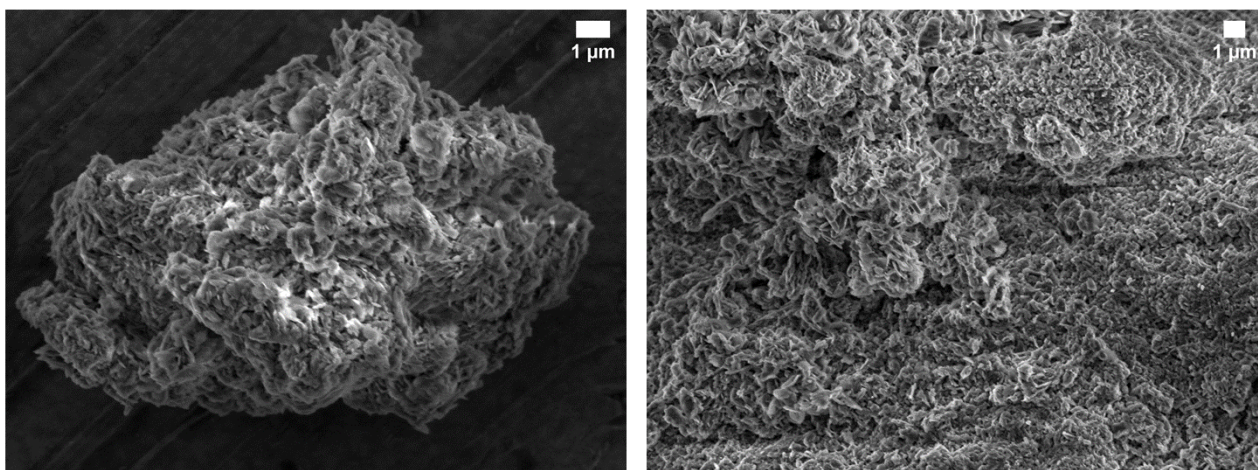

**Figure S9.** SEM images for as-synthesised powder of Na-(NDC+SDC)(MW).

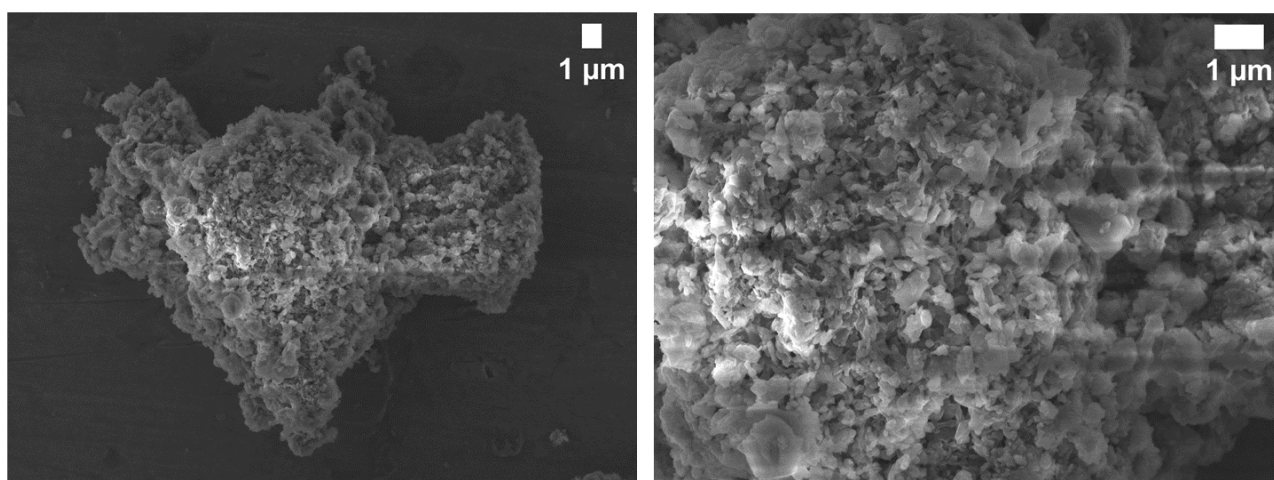

**Figure S10.** SEM images for as-synthesised powder of Na-SDC(MW).

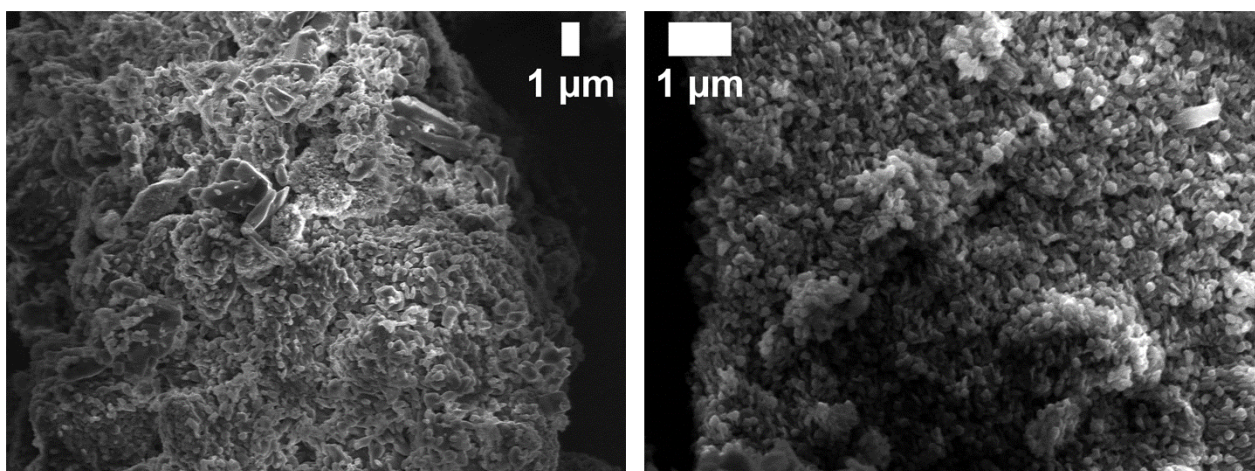

**Figure S11.** SEM images for as-synthesised powder of Na-(NDC+ABDC)(MW).

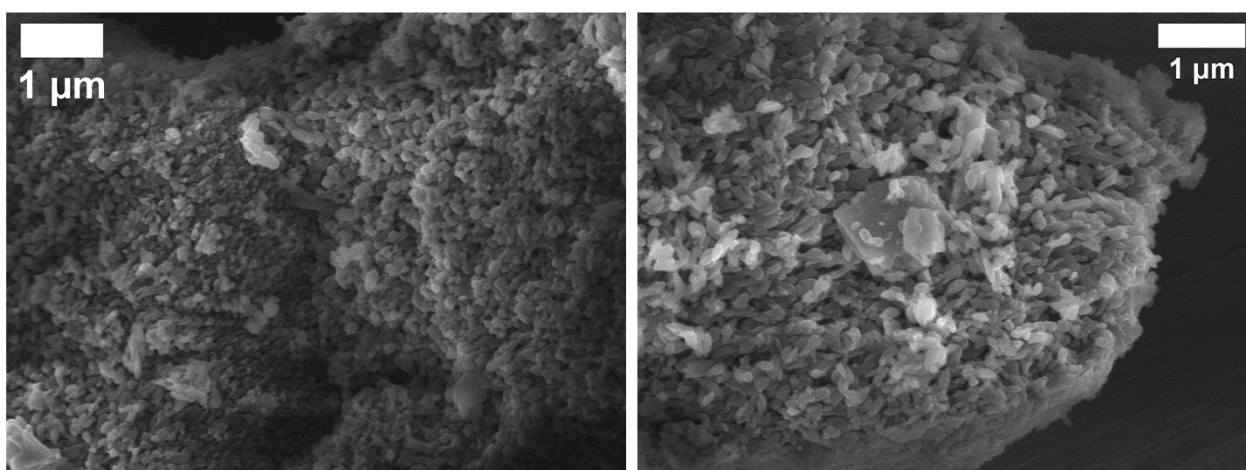

**Figure S12.** SEM images for as-synthesised powder of Na-ABDC(MW).



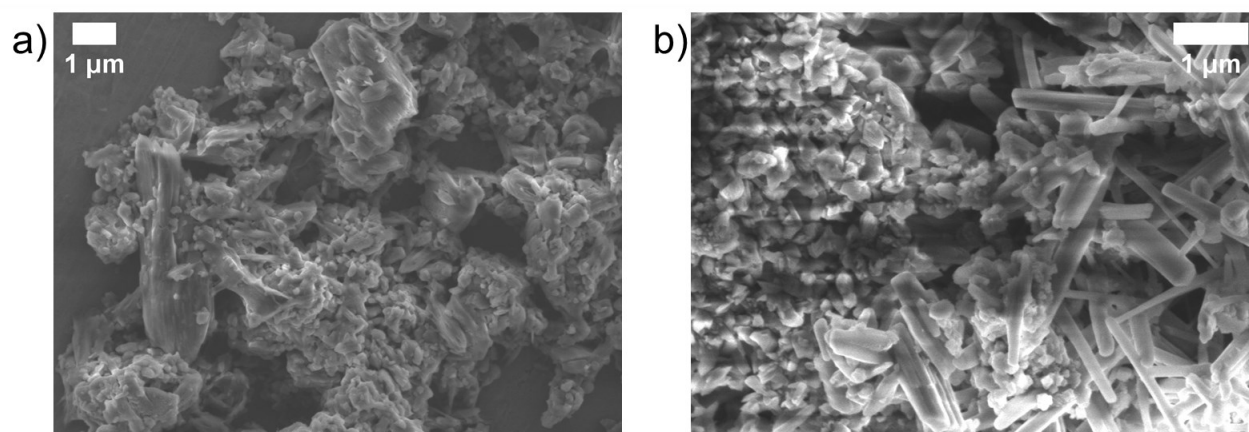

**Figure S13.** SEM images for mixtures formed by physically mixing individual sodium carboxylates, (a) Na-NDC(MW)+Na-SDC(MW) and (b) Na-NDC(MW)+Na-ABDC(MW).

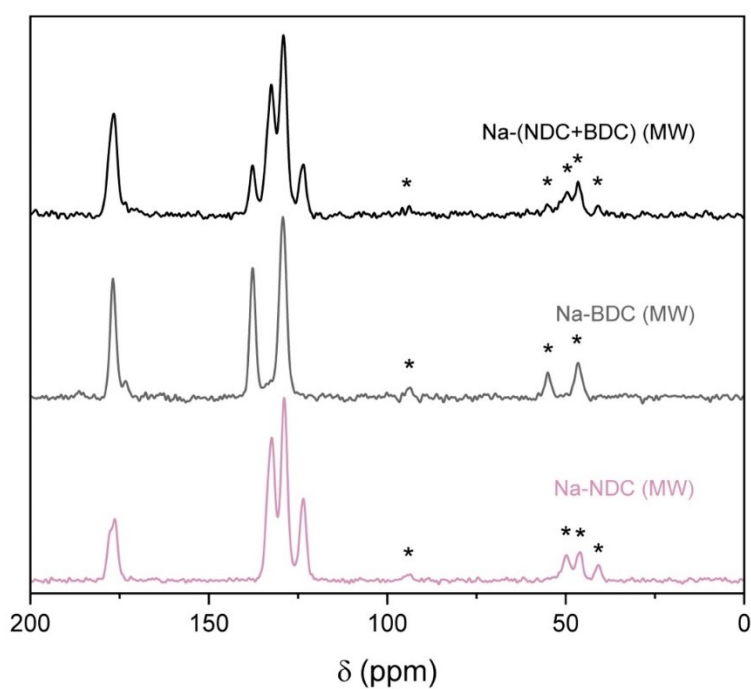

**Figure S14.**  $^{13}\text{C}$  (14.1 T, 12.5 kHz) CP MAS NMR spectra of single component sodium carboxylates [Na-NDC (MW), Na-BDC (MW)] and the mixture Na-(NDC+BDC) (MW). The \* symbols indicate spinning sidebands.

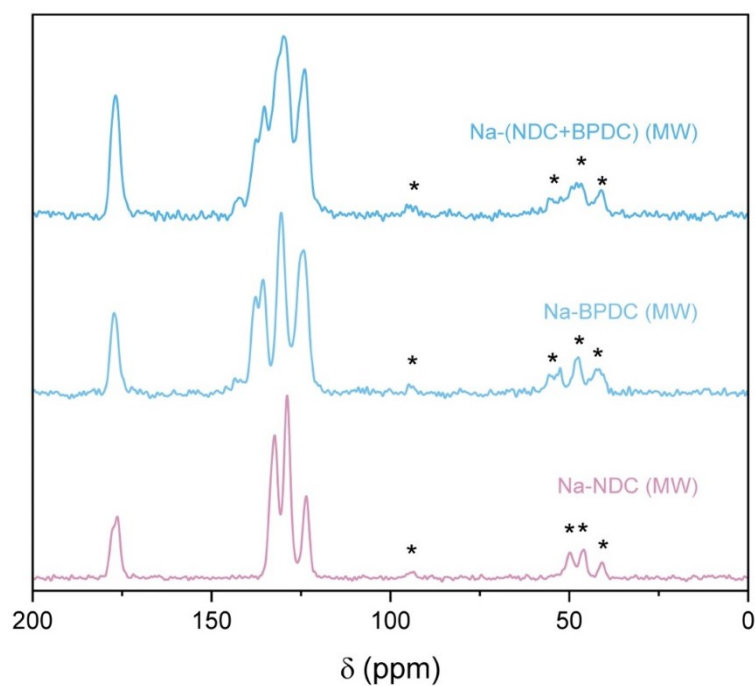

**Figure S15.**  $^{13}\text{C}$  (14.1 T, 12.5 kHz) CP MAS NMR spectra of single component sodium carboxylates [Na-NDC (MW), Na-BPDC (MW)] and the mixture Na-(NDC+BPDC) (MW). The \* symbols indicate spinning sidebands.

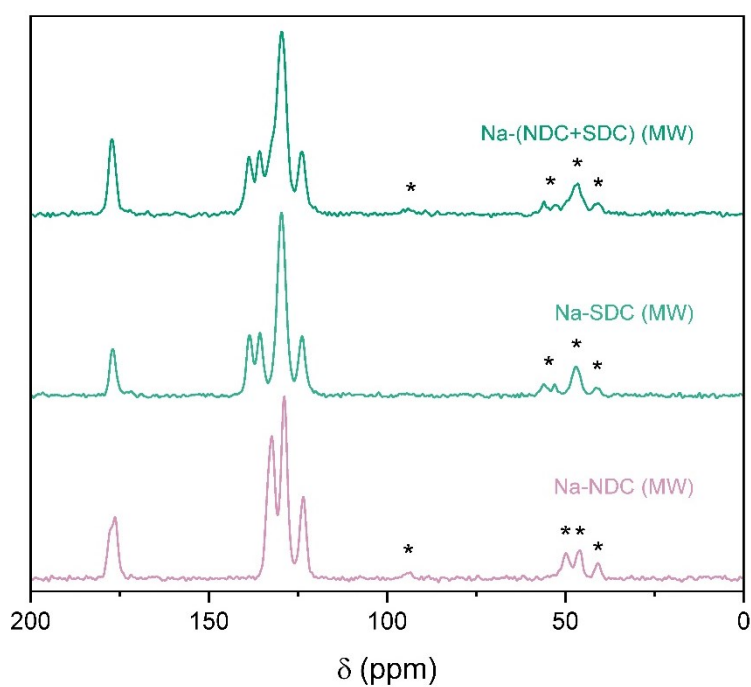

**Figure S16.**  $^{13}\text{C}$  (14.1 T, 12.5 kHz) CP MAS NMR spectra of single component sodium carboxylates [Na-NDC (MW), Na-SDC (MW)] and the mixture Na-(NDC+SDC) (MW). The \* symbols indicate spinning sidebands.

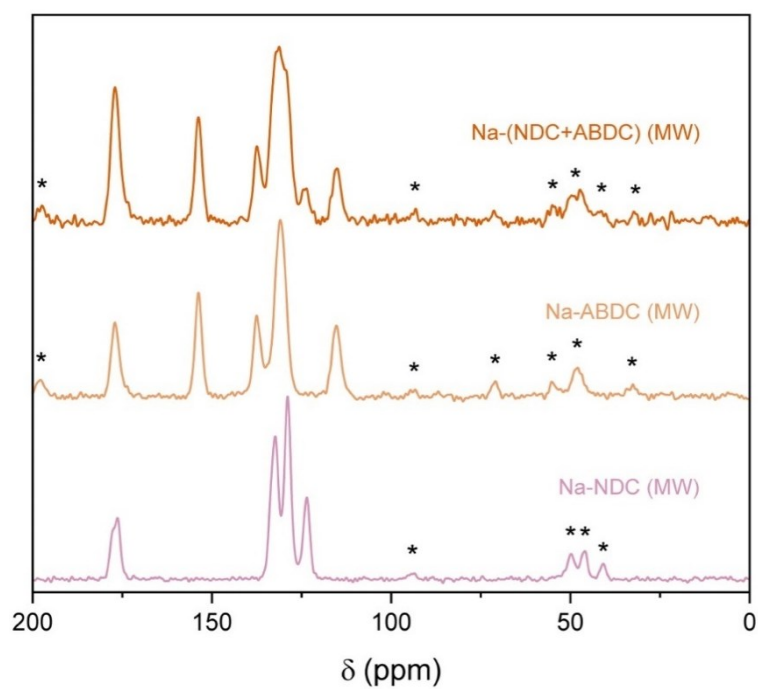

**Figure S17.**  $^{13}\text{C}$  (14.1 T, 12.5 kHz) CP MAS NMR spectra of single component sodium carboxylates [Na-NDC (MW), Na-ABDC (MW)] and the mixture Na-(NDC+ABDC) (MW). The \* symbols indicate spinning sidebands.

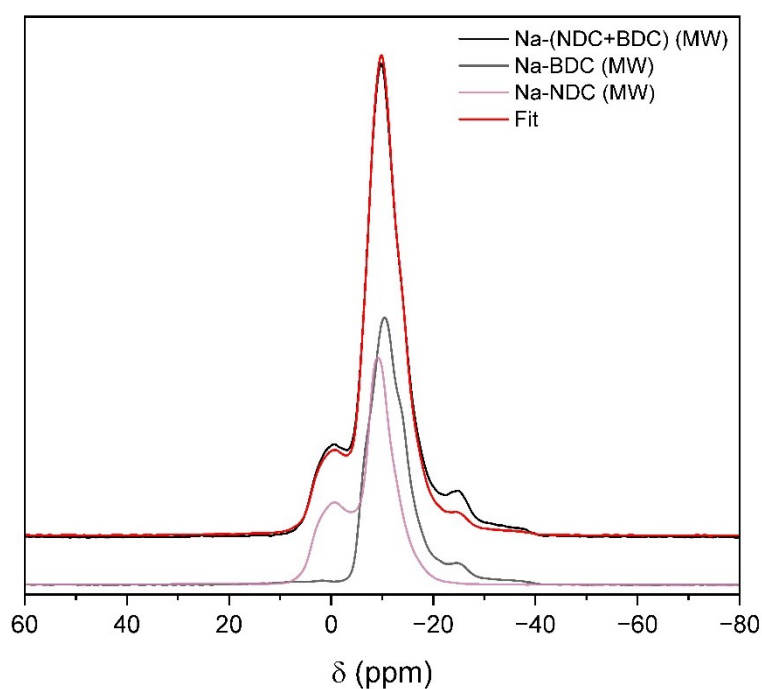

**Figure S18.**  $^{23}\text{Na}$  (9.4 T, 14 kHz) MAS NMR spectra of single component sodium carboxylates [Na-NDC (MW), Na-BDC (MW)] and the mixture Na-(NDC+BDC) (MW).

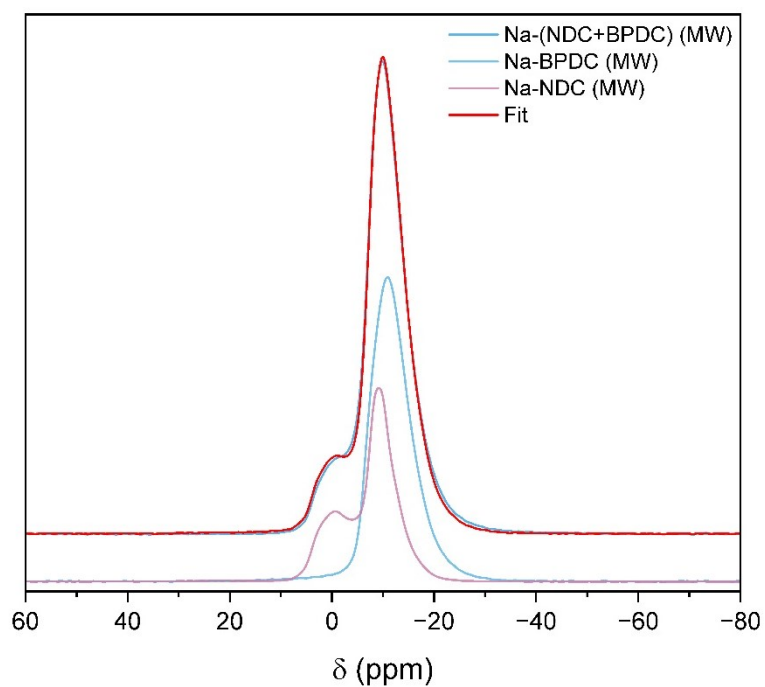

**Figure S19.**  $^{23}\text{Na}$  (9.4 T, 14 kHz) MAS NMR spectra of single component sodium carboxylates [Na-NDC (MW), Na-BPDC (MW)] and the mixture Na-(NDC+BPDC) (MW).

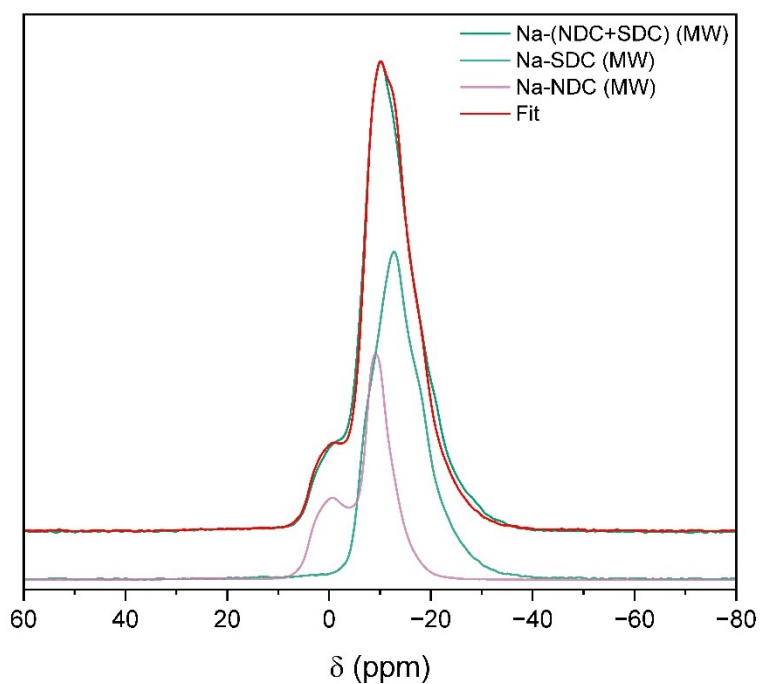

**Figure S20.**  $^{23}\text{Na}$  (9.4 T, 14 kHz) MAS NMR spectra of single component sodium carboxylates [Na-NDC (MW), Na-SDC (MW)] and the mixture Na-(NDC+SDC) (MW).

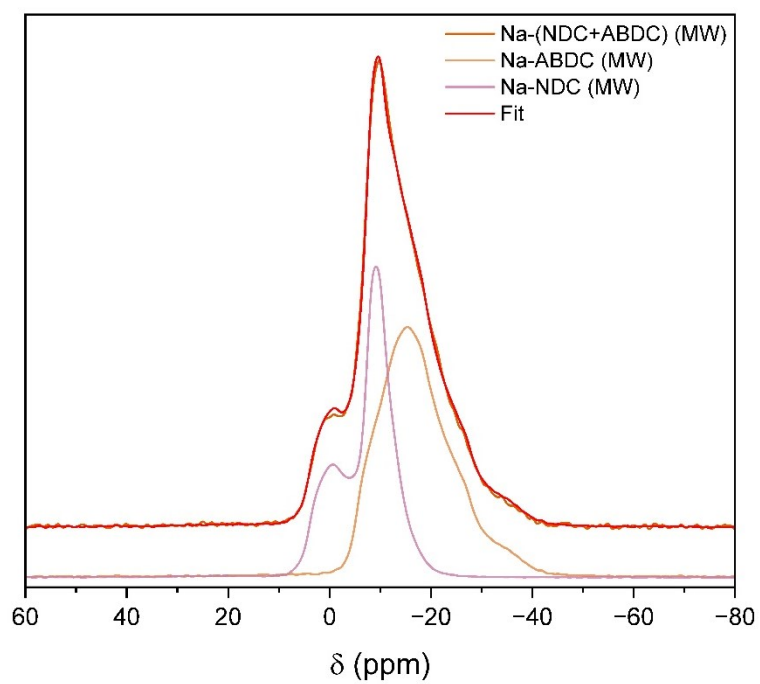

**Figure S21.**  $^{23}\text{Na}$  (9.4 T, 14 kHz) MAS NMR spectra of single component sodium carboxylates [Na-NDC (MW), Na-ABDC (MW)] and the mixture Na-(NDC+ABDC) (MW).

**Table S1.** Estimation of the molar percentage of each component in the mixtures obtained from the <sup>23</sup>Na MAS NMR spectra in Figures S18-S21.

| Mixture       | Percentage of Na <sub>2</sub> NDC | Percentage of the other component |
|---------------|-----------------------------------|-----------------------------------|
| Na-(NDC+BDC)  | 52(3)%                            | 48(3)%                            |
| Na-(NDC+BPDC) | 39(3)%                            | 61(3)%                            |
| Na-(NDC+SDC)  | 35(3)%                            | 65(3)%                            |
| Na-(NDC+ABDC) | 41(3)%                            | 59(3)%                            |

**Table S2.** Elemental analysis results for all the mixtures and corresponding estimated values

| Material          | Estimated (%) for 1:1 product | Found (%) [C, ±0.23; H, ±0.07; N, ±0.09] | Estimated (%) for proportions estimated by NMR fitting |
|-------------------|-------------------------------|------------------------------------------|--------------------------------------------------------|
| Na-(NDC+BDC)(MW)  | C, 51.08; H, 2.14             | C, 49.92; H, 2.62                        | C, 51.27; H, 2.15                                      |
| Na-(NDC+BPDC)(MW) | C, 57.16; H, 2.58             | C, 55.71; H, 2.72                        | C, 57.52; H, 2.64                                      |
| Na-(NDC+SDC)(MW)  | C, 58.76; H, 2.82             | C, 59.04; H, 3.09                        | C, 59.65; H, 2.95                                      |
| Na-(NDC+ABDC)(MW) | C, 54.37; H, 2.46;<br>N, 4.88 | C, 55.27; H, 2.38;<br>N, 5.75            | C, 54.21; H, 2.48;<br>N, 5.66                          |

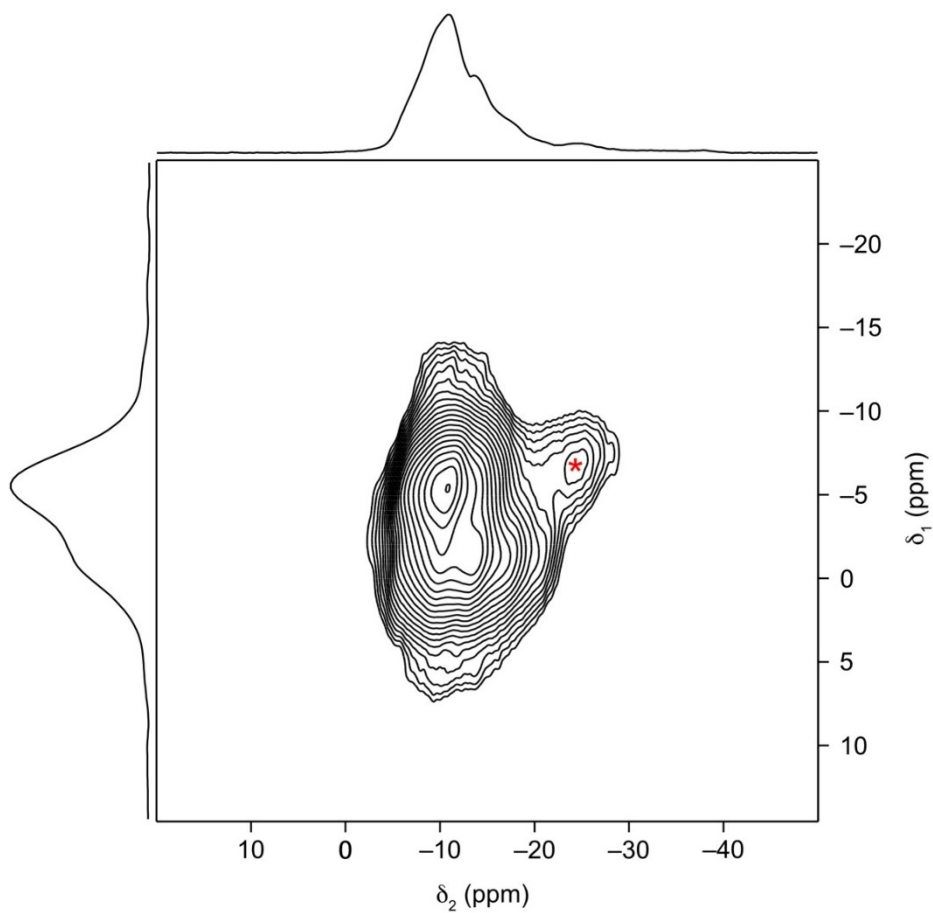

**Figure S22.**  $^{23}\text{Na}$  (9.4 T, 14 kHz) MQMAS NMR spectrum of the single component sodium benzene-1,4-dicarboxylate [Na-BDC (MW)]. The \* symbol indicates the additional signal when compared with the Na-BDC spectrum from Whewell *et al.*<sup>1</sup>

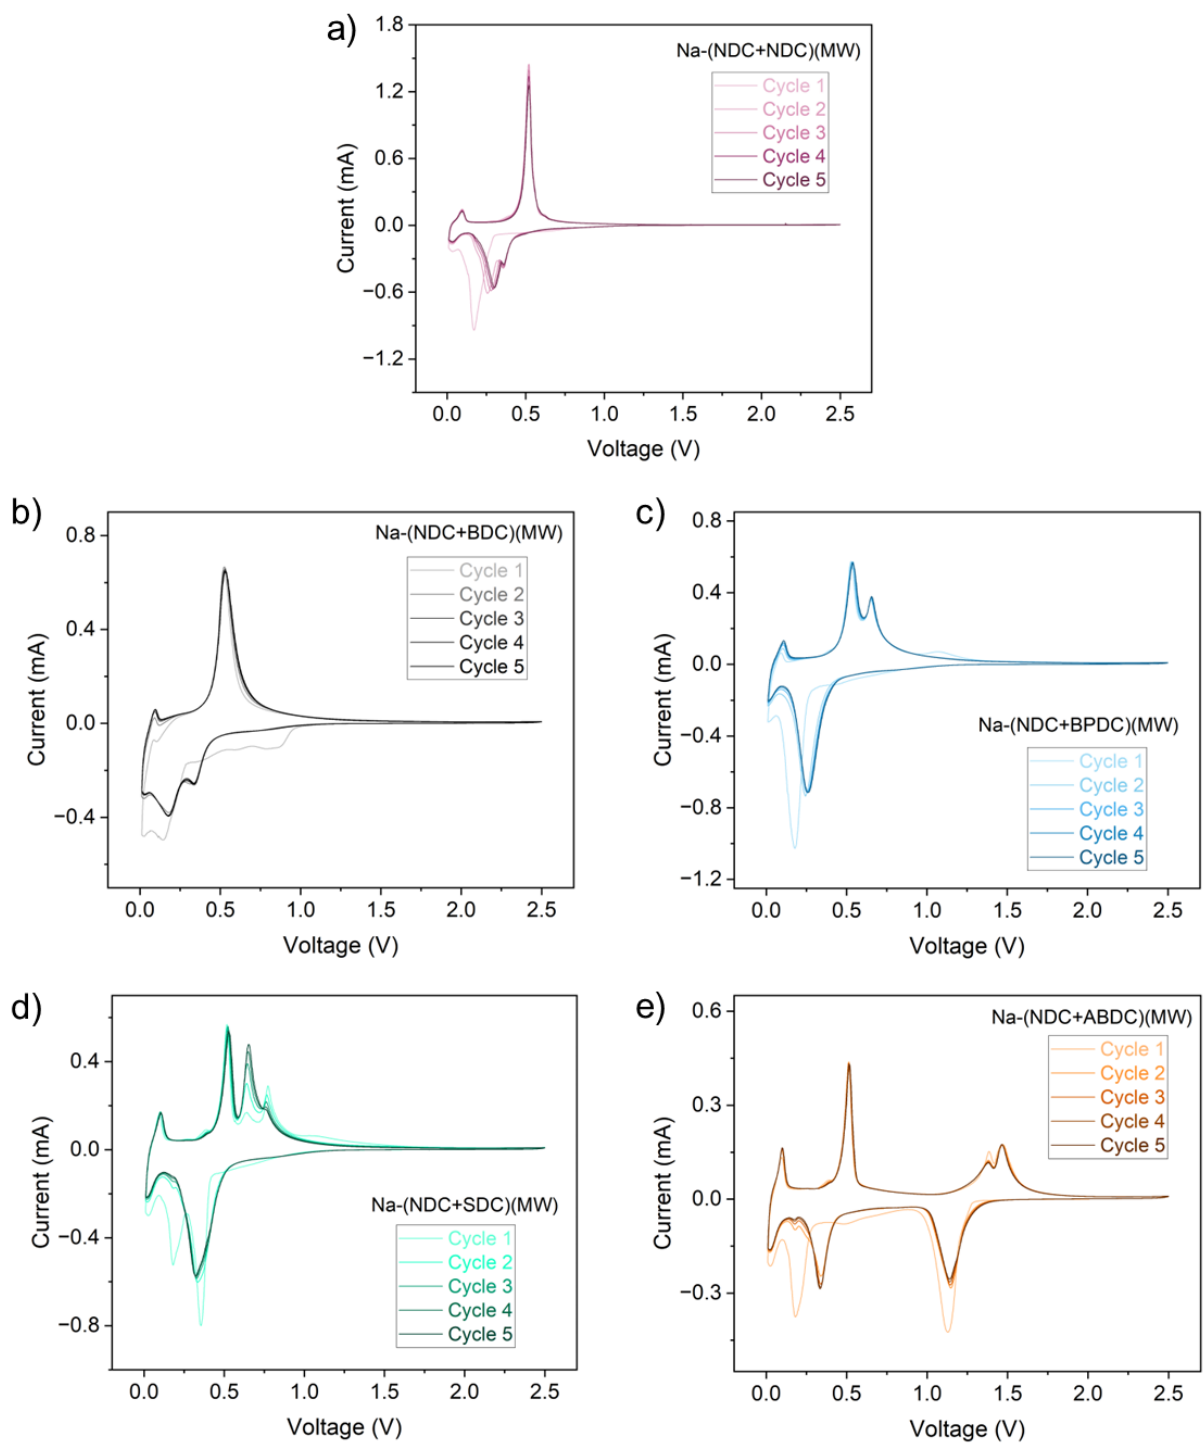

**Figure S23.** Cyclic voltammograms measured at a scan rate of  $0.1 \text{ mV s}^{-1}$  for 5 cycles for a) Na-(NDC+NDC)(MW), b) Na-(NDC+BDC)(MW), c) Na-(NDC+BPDC)(MW), d) Na-(NDC+SDC)(MW), e) Na-(NDC+ABDC)(MW).



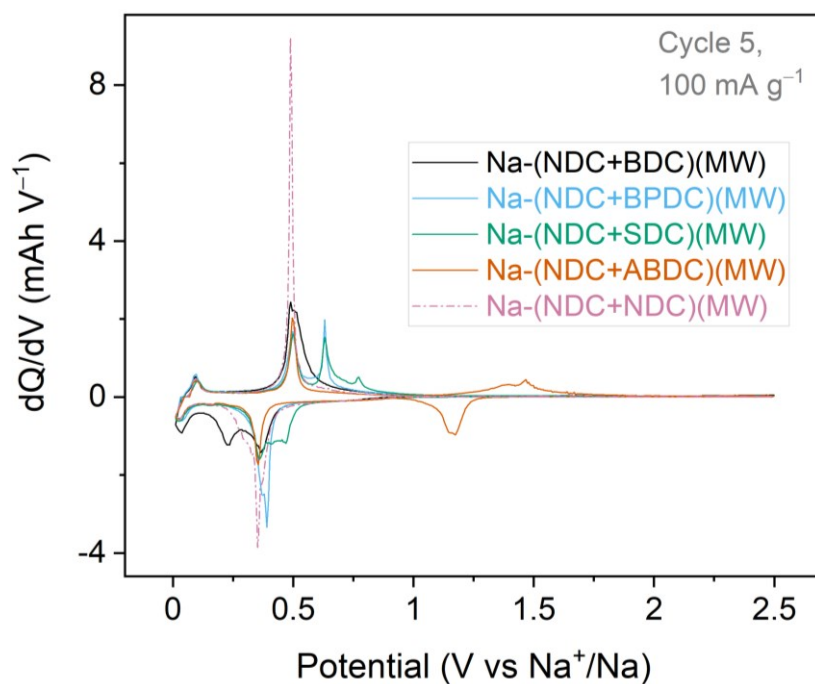

**Figure S24.** Differential capacity plot for the 5<sup>th</sup> cycle for all mixtures when cycled at 100 mA g<sup>-1</sup>, compared to Na-(NDC+NDC)(MW).

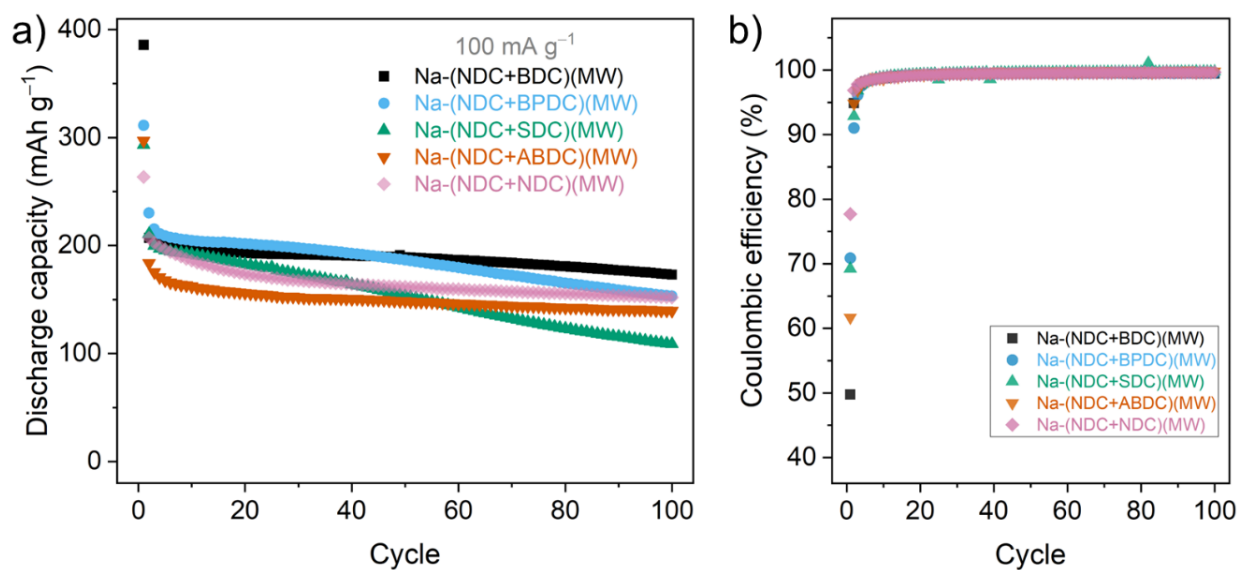

**Figure S25.** a) Discharge capacities and b) Coulombic efficiencies over 100 cycles for all the mixtures and Na-(NDC+NDC)(MW), cycled between 0.01-2.5 V at 100 mA g<sup>-1</sup>.

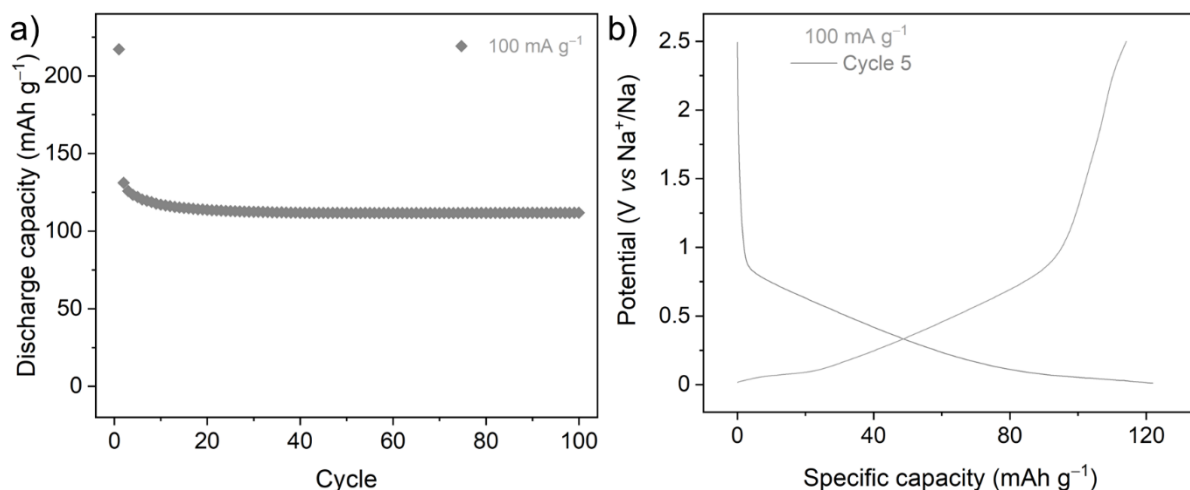

**Figure S26.** a) Discharge capacities over 100 cycles and b) voltage curve for the 5<sup>th</sup> cycle for an electrode containing only the carbon (90%) and binder (10%), cycled in half cell between 0.01-2.5 V at 100 mA g<sup>-1</sup>. Based on the stable capacity of 112 mAh g<sup>-1</sup>, maximum capacity contribution to electrodes prepared using 30% carbon would be 37.33 mAh g<sup>-1</sup>.

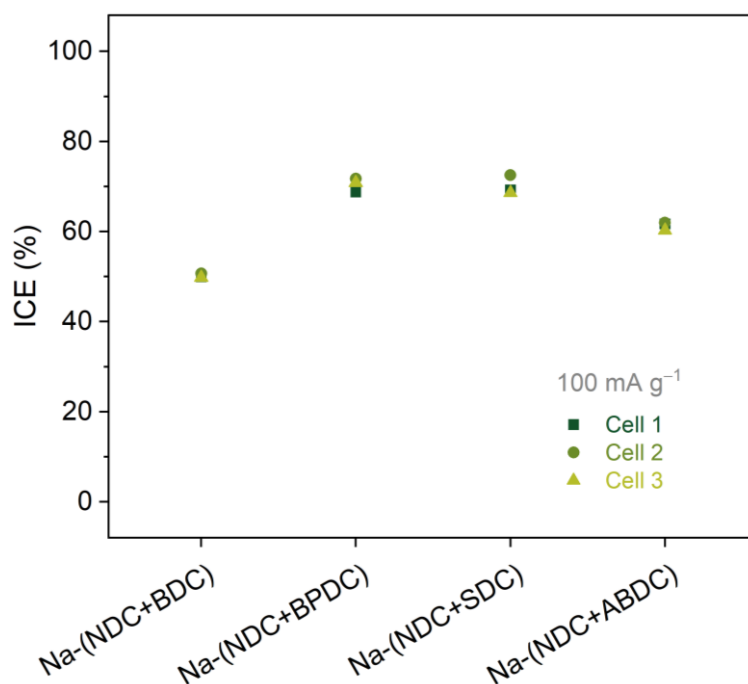

**Figure S27.** ICE values for 3 cells of all the mixtures cycled between 0.01-2.5 V at 100 mA g<sup>-1</sup>.

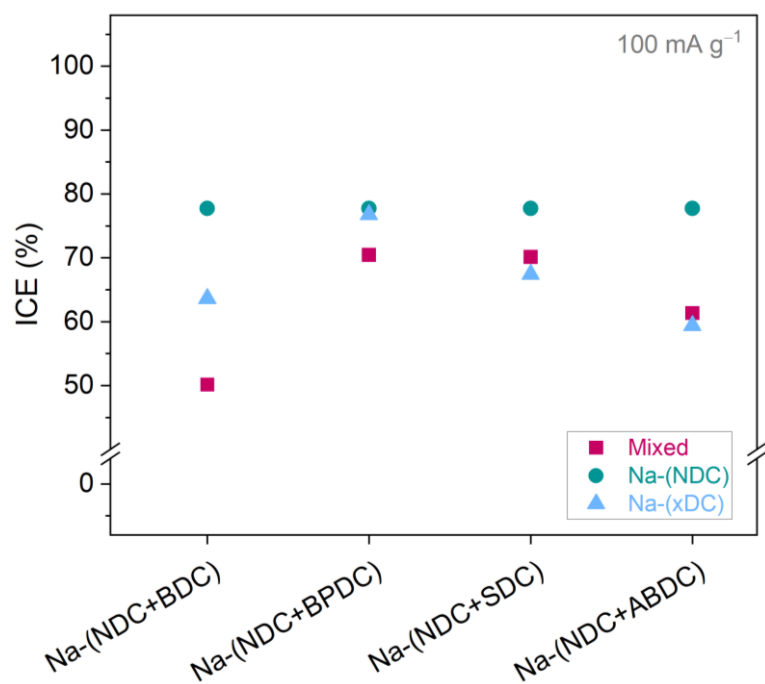

**Figure S28.** Comparison of ICE values for all the mixtures, relative to Na-(NDC)(MW) and respective individual sodium carboxylates [Na-(xDC)(MW)], cycled between 0.01-2.5 V at  $100 \text{ mA g}^{-1}$ . The numbers for mixed materials are an average value of 3 cells.

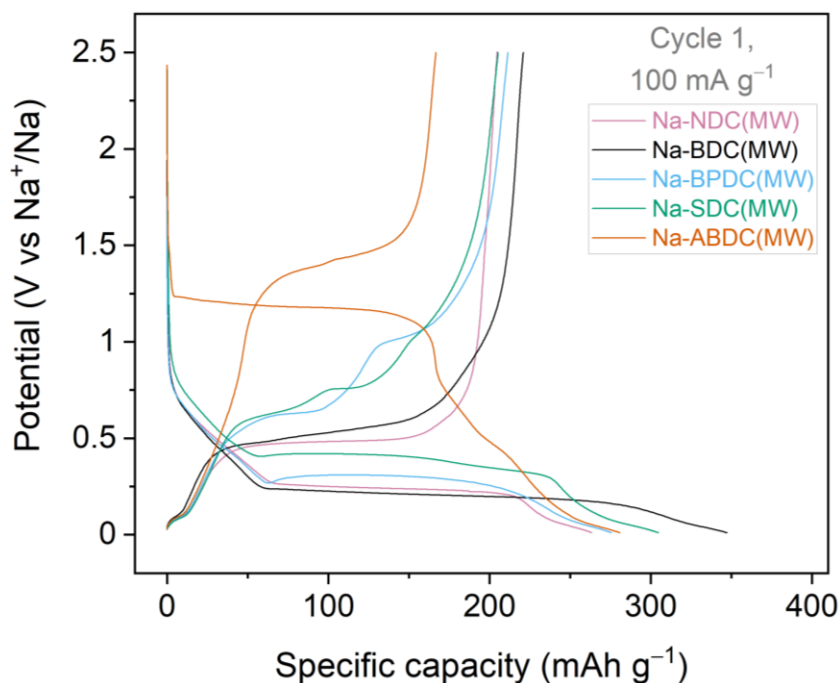

**Figure S29.** Charge/discharge traces for the first cycle of all the single component sodium carboxylates, cycled between 0.01-2.5 V at  $100 \text{ mA g}^{-1}$ .

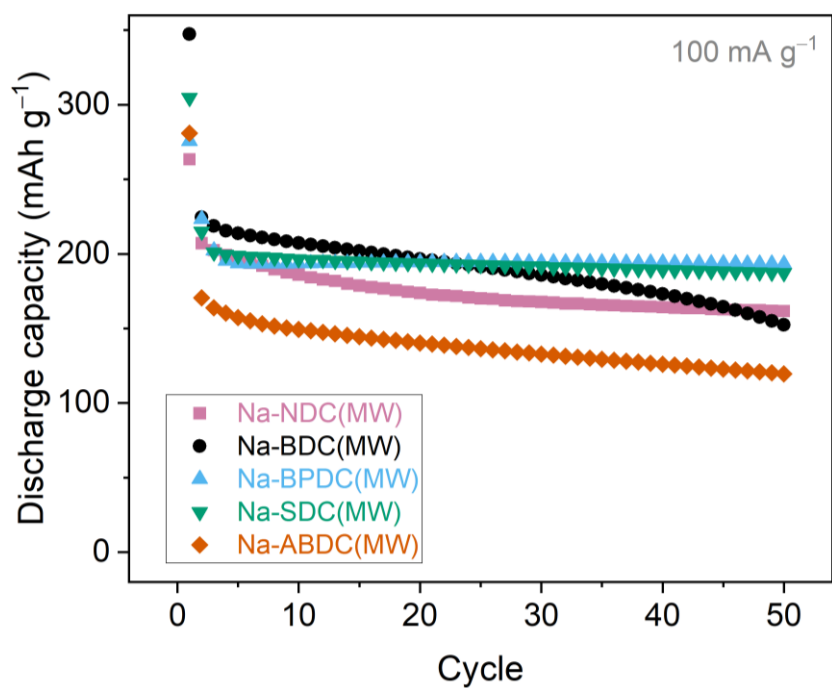

**Figure S30.** Discharge capacities for all the single component sodium carboxylates, cycled between 0.01-2.5 V at  $100 \text{ mA g}^{-1}$ .

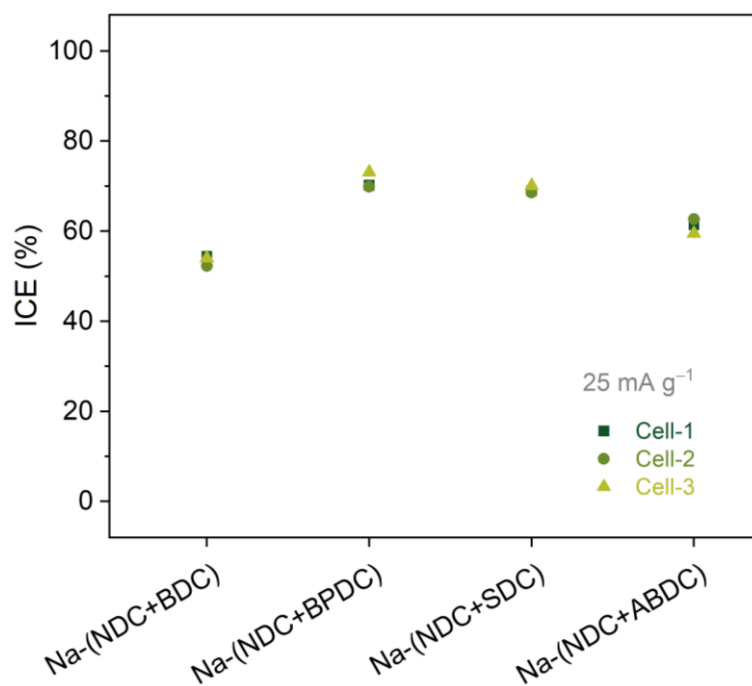

**Figure S31.** ICE values for 3 cells of all the mixtures cycled between 0.01-2.5 V at  $25 \text{ mA g}^{-1}$ .

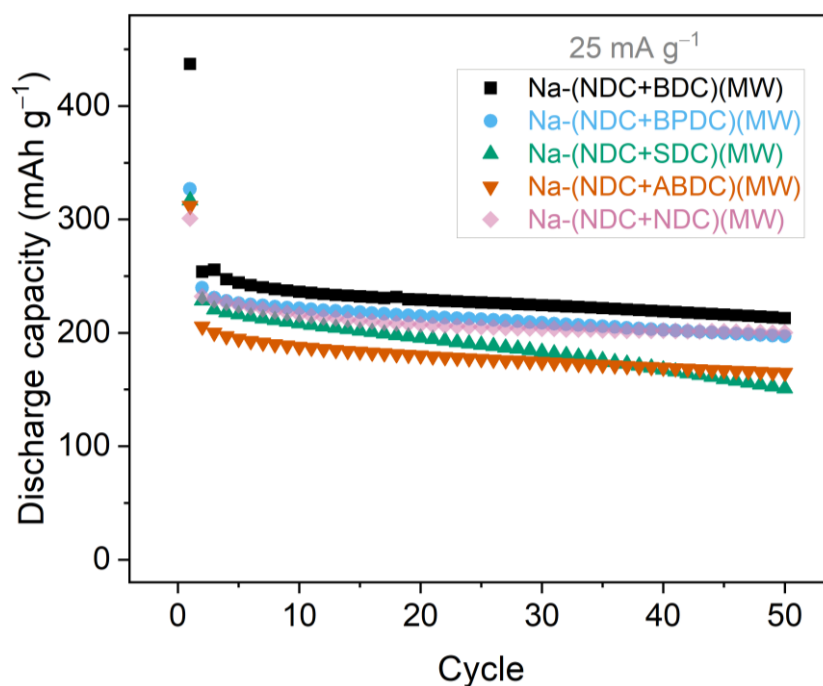

**Figure S32.** Discharge capacities for all the mixtures and Na-NDC(MW) upon galvanostatic cycling over 50 cycles at  $25 \text{ mA g}^{-1}$  between 0.01-2.5 V.

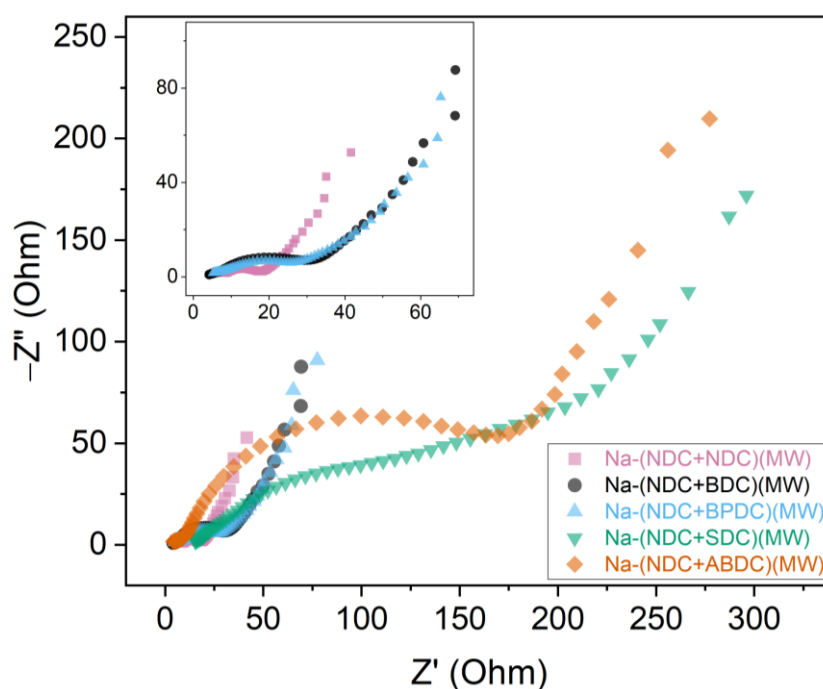

**Figure S33.** Nyquist plots for all materials obtained in symmetric cell format after completing one discharge-charge cycle. Inset: Zoomed version showing the plots for Na-(NDC+NDC)(MW), Na-(NDC+BDC)(MW) and Na-(NDC+BPDC)(MW).

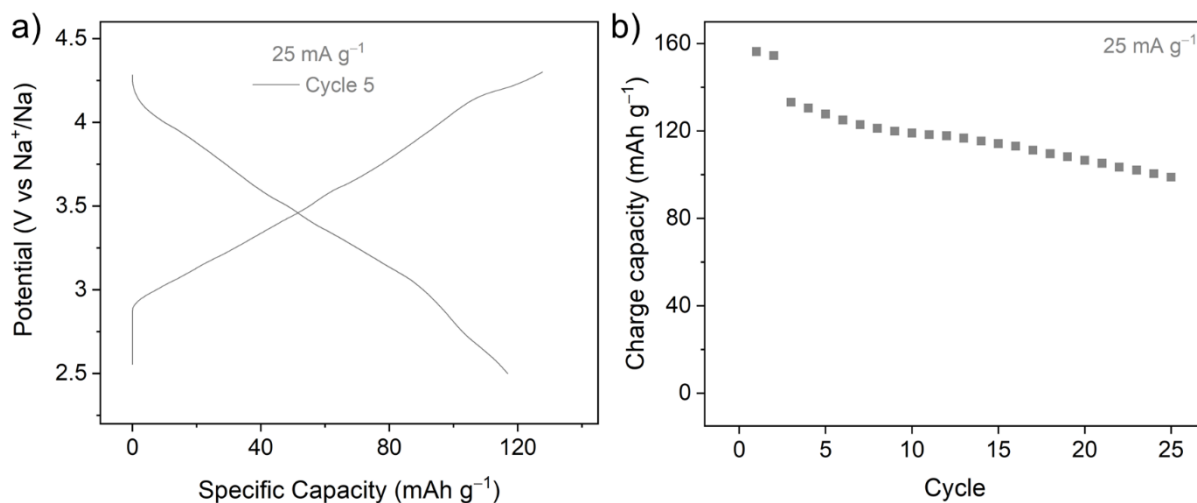

**Figure S34.** a) Voltage curve for the 5<sup>th</sup> cycle and b) discharge capacities over 25 cycles for the cathode material cycled in half cell between 2.5-4.3 V at 25 mA g<sup>-1</sup>.

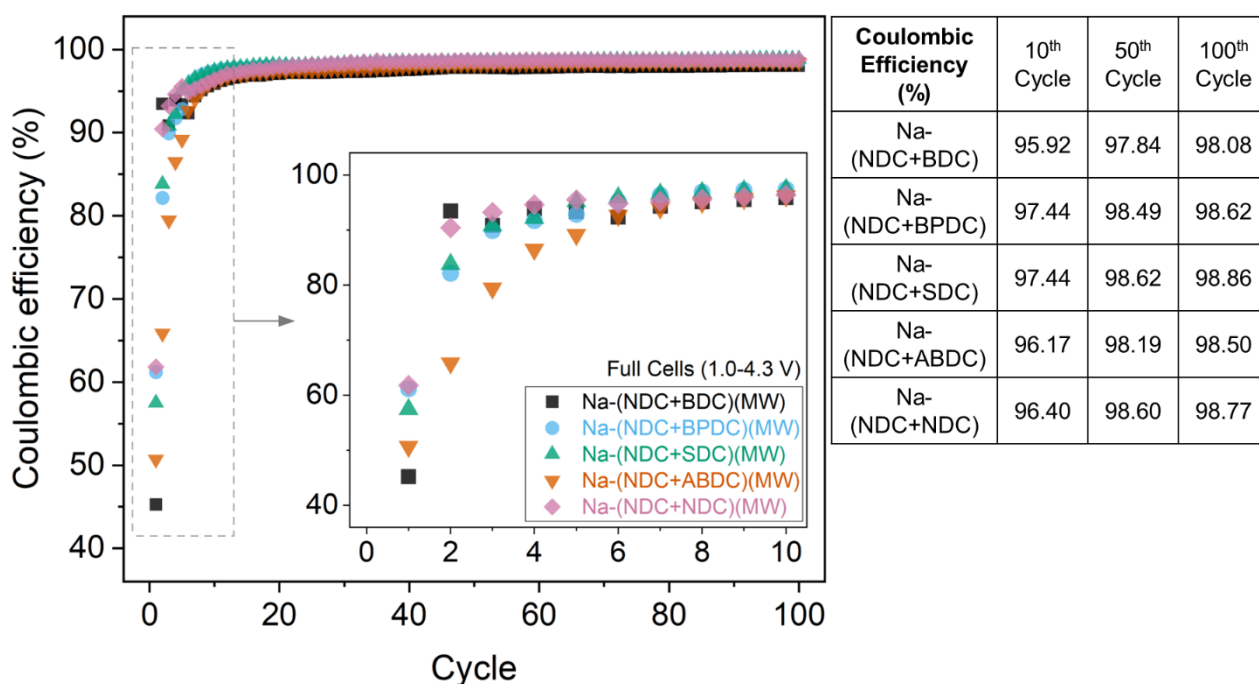

**Figure S35.** Coulombic efficiencies (CE) for full cells of binary mixtures and single component Na-NDC(MW). Inset: zoomed version showing the change in CE over the first 10 cycles. (Right) Table with the CE values for the 10<sup>th</sup>, 50<sup>th</sup> and 100<sup>th</sup> cycle.

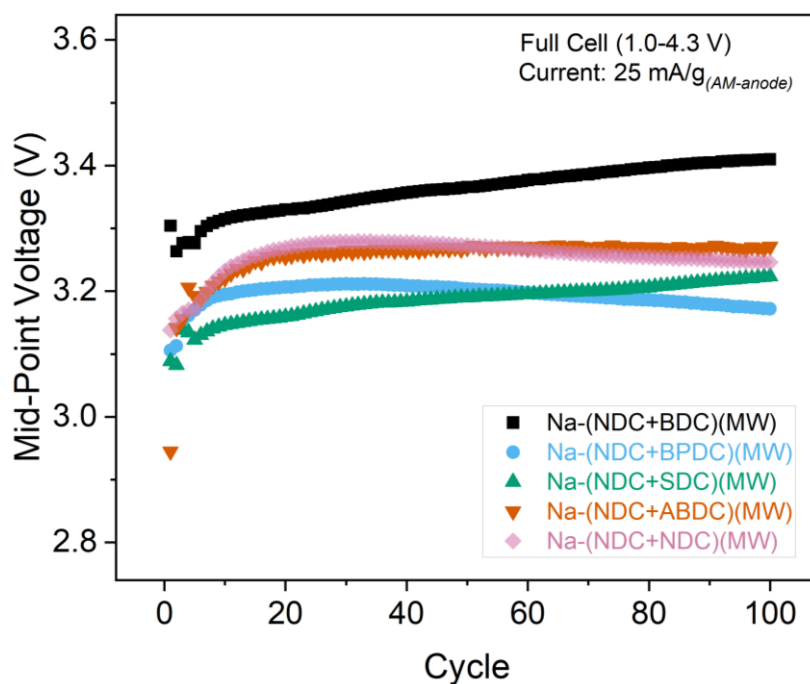

**Figure S36.** Mid-point voltage (MPV) values for full cells of the binary mixtures and single component Na-NDC(MW). MPV values have been computed as the voltage corresponding to 50% of the discharge capacity in every cycle.

## Reference

- 1 T. Whewell, V. R. Seymour, K. Griffiths, N. R. Halcovitch, A. V Desai, R. E. Morris, A. R. Armstrong and J. M. Griffin, *Magn. Reson. Chem.*, 2022, **60**, 489–503.
